# Supplementary material
Source: bioRxiv or medRxiv preprint supplement (https://www.biorxiv.org/highwire/filestream/112490/field_highwire_adjunct_files/16/355669-7.pdf)

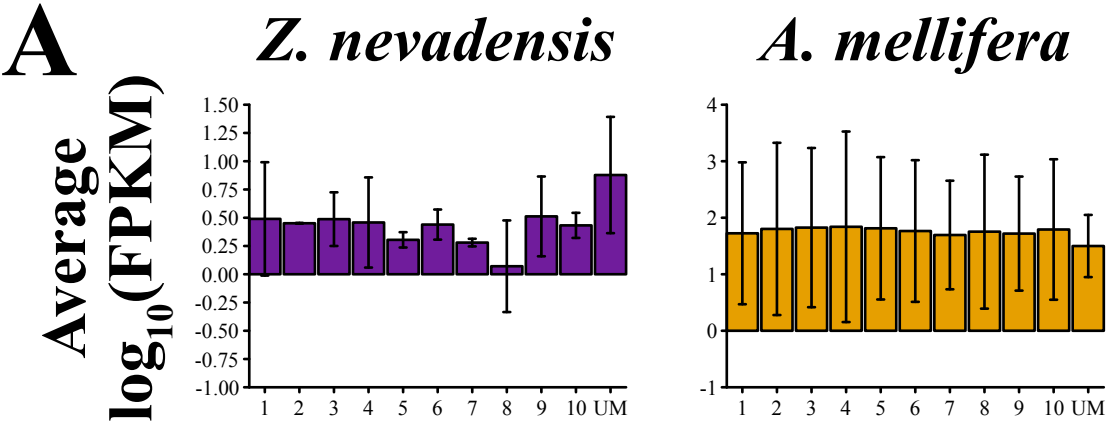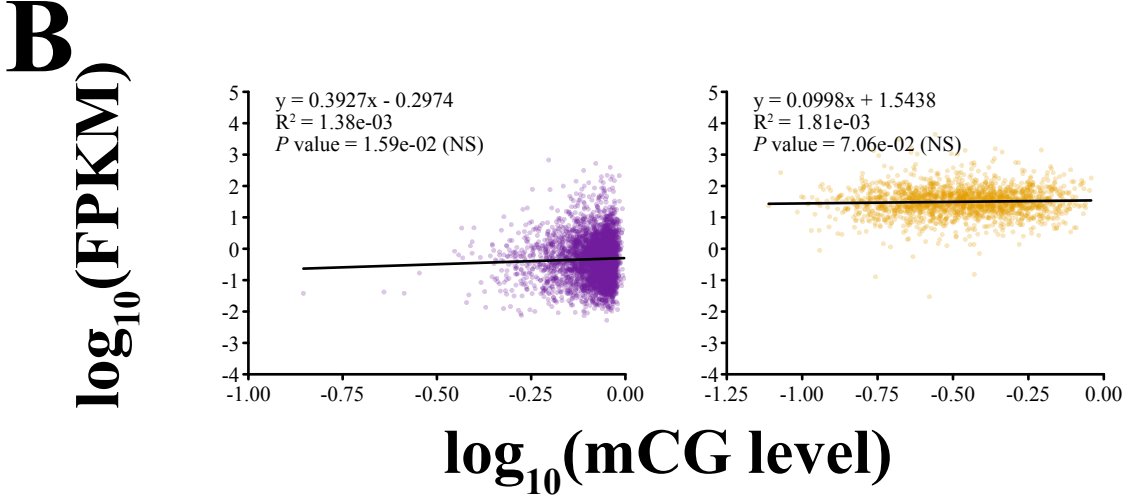

Supplement: Supplementary file [file 355669-7.pdf]
